# Supplementary material for: Productive screening of single aptamers with ddPCR
Source: Royal Society of Chemistry journal article supplement (doi:10.1039/d0an00460j), 2020-01-01
Supplement: d0an00460j1.pdf [file d0an00460j1.pdf]

1

## Supplementary Information

2

3

### Productive Screening of Single Aptamers with ddPCR

4

5 Jinyu Chen †<sup>a</sup>, Jinjun Wang †<sup>b</sup>, Zhaofeng Luo †<sup>b</sup>, Xiaona Fang<sup>b</sup>, Lei He<sup>b</sup>, Jianwei Zhu<sup>a</sup>,

6 Zahra Qurat ul ain<sup>b</sup>, Jinlong He<sup>a</sup>, Huan Ma<sup>b</sup>, Haiyan Zhang<sup>b</sup>, Minghou Liu<sup>a</sup> and Liqun

7 He<sup>\*,a</sup>

8 a. Department of Thermal Science and Energy Engineering, University of Science and

9 Technology of China, Hefei, China, 230027.

10 b. School of Life Sciences, University of Science and Technology of China, Hefei, 230027.

11 \* Corresponding author. E-mail: heliqun@ustc.edu.cn

12 † These authors contributed equally to this work.

13

14

## 1 **1 Monitoring the progress of aptamer selection**

2 We use the qPCR method to monitor the screening process.[1] At Round 1-3, four times  
3 washing was subsequently performed to continuously remove unbound and weakly bound DNAs.  
4 Add 200ul MES buffer to the MB-PDL1 beads for 10min at boiling water bath. Then, use the  
5 magnet fix MB-PDL1 beads to removing the supernatant (MB-PDL1 elution). Then was then  
6 incubated with MB-PD1 beads in binding buffer for 0.5 h at room temperature. The magnetic  
7 beads were washed three times with 100  $\mu$ L of MES buffer. Then, use the magnet fix MB-PD1  
8 beads to removing the supernatant (MB-PD1 elution). After that, we use qPCR method to  
9 detection retention rate Fig.S1(Round 1-3) .

10 After sorting the micro-beads, the samples were detected by qPCR and the  
11 control sample was the PCRmix. It can be seen from the FigS1 (Round 4 and 5 )that the red  
12 and yellow lines (green and blue in Round 5) are positive samples, and the rest are control samples.  
13 It can be seen that the Cq value of the sample obtained by sorting is smaller than that of the  
14 control sample, indicating the effectiveness of this sorting process.

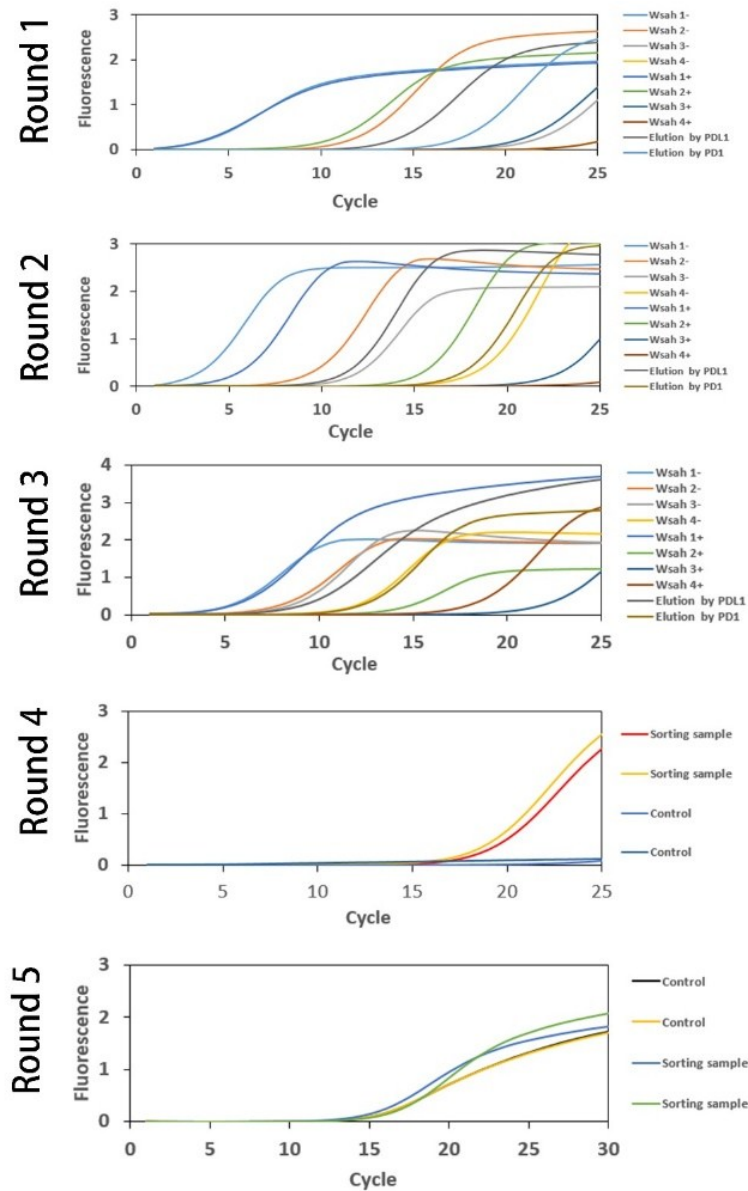

1

2 **Fig.S1** qPCR to monitor the screening process. At Round 1-3, four times washing was  
 3 subsequently performed to continuously remove unbound and weakly bound DNAs. We use this  
 4 method to detection retention rate; Round 4 the red and yellow lines (green and blue in Round 5)  
 5 are positive sorting samples, and the rest are control samples. It can be seen that the C<sub>q</sub> value of  
 6 the sample obtained by sorting is smaller than that of the control sample, indicating the  
 7 effectiveness of this sorting process.

## 1 2 Retention rate of the screening (1-3rounds)

2 The traditional screening process needs to obtain the retention rate of each round as a basis for the  
3 reliability of the screening process. It can be seen from the FigS2 that the retention rate of the  
4 positive screening is significantly improved in the 1-3 rounds. So after third round, we combine  
5 the capillary based digital PCR system for single molecule amplification and flow sorting for  
6 screening.

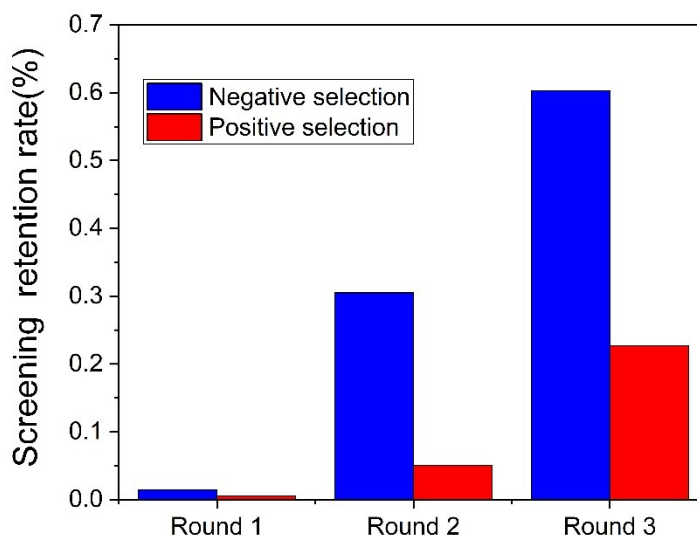

7

8

**Fig.S2** Retention rate of the screening process with 1-3rounds

9

## 1 **References**

2 [1] Luo, Z. F.; He, L.; Wang, J. J.; Fang, X. N.; Zhang, L. Y., *Analyst* **2017**, *142*.

3
